# Supplementary material for: Developing EFL Preservice Teachers' Oral Communicative Competence and Autonomy Utilizing Literature Circles and Process Drama Design
Source: Research Square preprint supplement (doi:10.21203/rs.3.rs-4653708/v1), 2024-07-24
Supplement: Supplementary file 1 [file a680ce7bcaa629a068a78e1a.docx]

**Appendix (A)**

**The Oral Communicative Competence Rubric**

**Rater’s Rubric Form”**

Rater: …………………………

Student’s name: ……………….

Date: ………………………….

| Main Component | 1. Strategic competence | | |
| --- | --- | --- | --- |
| Subcomponents | Always | Sometimes | Never |
| Students are able to: |  |  |  |
| 1. Use synonyms: To give similar meaning of a word or a phrase in the same language. |  |  |  |
| 1. Ask for help: To ask for aid from the interlocutor either directly (e.g., what do you call…? or indirectly (e.g., rising intonation, pause, eye contact, puzzled expression). |  |  |  |
| 1. Use circumlocution: The use of more words than necessary to express an idea (e.g. you know, you follow, you understand). |  |  |  |
| 1. Use definitions: To give a statement of the exact meaning of a word. |  |  |  |
| 1. Use approximation: To describe or exemplify the target object or action |  |  |  |
| 1. Use repetitions: To repeat the same words or phrases a few times to make an idea clearer. |  |  |  |
| 1. Use stalling for time-gaining strategies: To use fillers devices to fill pauses and to gain time to think (e.g., well, now let’s see, uh, as a matter of fact). |  |  |  |
| 1. Display effective use of body language (miming, gesture, and facial expressions) to communicate without words. |  |  |  |
| 1. Employ Topic avoidance: To avoid or change the topic when he/she lacks the proficiency to continue). |  |  |  |
| 1. Employ paraphrasing: To use one’s own words to express idea of (something written or spoken). |  |  |  |
| Main Component | 2. Sociolinguistic Competence | | |
| Subcomponents | Always | Sometimes | Never |
| Students are able to: |  |  |  |
| 1. Speak in a complete sentence. |  |  |  |
| 1. Communicate in an expressive and appropriate intonation. |  |  |  |
| 1. Speak in a continuous flow. |  |  |  |
| 1. Display confidence in the interactive process. |  |  |  |
| 1. Know when to speak. |  |  |  |
| 1. Recognize the best way of delivering the message. |  |  |  |
| 1. Respond with little hesitation. |  |  |  |
| 1. Respond with appropriate greeting, courtesy, and apology. |  |  |  |
| 1. Use proper lexis to fit the situation |  |  |  |
| 1. Keep the personal and interpersonal space. |  |  |  |
| 1. Use proper register (formal/informal) in speech. |  |  |  |

**Appendix (B)**

**The Oral Communicative Competence Test**

**(Written Form and Recorded)**

**Faculty of Education**

**Name:**

**Year: third**

**Respond to the following situations:**

1. If you have read an exciting short story, respond to the following:
   1. What is the title of the short story?
   2. Explain the behavior of the hero through role-playing.
   3. Do you agree with him? Explain your answer.
   4. Put yourself in the hero's shoes and behave.
   5. Describe the main features of the hero.
2. You are applying for a job in an international school, and you will meet the manager. What would you say concerning the following:
3. Greeting,
4. Introducing yourself,
5. Your own past experience, your own achievement and your ambitions, and
6. Ending the meeting?
7. Here is a short silent video clip. Watch it and respond to the following:

a) Give a title to the video.

b) Retell it in your own words.

c) What did you learn from it?

d) Is this a good way of achieving one’s goals in life? Why? Why not?

Good Luck

**Appendix (C)**

**The Perspective Teacher’s Autonomy Scale**

| Statements   As a prospective teacher: | Strongly agree | To some extent | Strongly disagree |
| --- | --- | --- | --- |
| 1. Taking Initiative |  |  |  |
| 1. I determine my learning aims. |  |  |  |
| 2. I do my best to achieve my learning aims |  |  |  |
| 3. I prepare a clear plan for studying on my own. |  |  |  |
| 4. I am good at creating a practical study schedule for myself. |  |  |  |
| 5. I nominate the content material that appeal to me. |  |  |  |
| 6. I choose the strategies and techniques of my own learning. |  |  |  |
| 7. I determine the tasks of my learning. |  |  |  |
| 8. I determine the suitable criteria for the evaluation of my learning |  |  |  |
| 1. Self-Monitoring |  |  |  |
| 9. I can consciously monitor the usage of listening strategies during practice. |  |  |  |
| 10. I can consciously monitor the usage of speaking strategies during practice. |  |  |  |
| 11. I can consciously monitor the usage of reading strategies during practice. |  |  |  |
| 12. I can consciously monitor the usage of writing strategies during practice. |  |  |  |
| 13. I consciously conduct the right criteria to evaluate my own learning. |  |  |  |
| 14.  I am able to solve problems in my method of studying. |  |  |  |
| 1. Social Interaction |  |  |  |
| 15. I practice my oral English skills with my colleagues. |  |  |  |
| 16. I review my studying materials with my instructor. |  |  |  |
| 17. I help my colleagues to improve their oral skills. |  |  |  |
| 1. The Evaluating of the Learning Process |  |  |  |
| 18. I correct my oral communication mistakes |  |  |  |
| 19. I can overcome some emotional issues, (shyness and anxiety) that may hinder my oral communication. |  |  |  |
| 20. I evaluate my colleagues’ learning problems. |  |  |  |
| 21. I establish critical discussions with my colleagues concerning our oral communication mistakes. |  |  |  |
| 22. I perform some extra-curricular activities to practice my oral English. (e.g., using English to talk to colleagues about daily life, participating in English speaking activities, and reading E newspapers, etc.) |  |  |  |
